# Supplementary material
Source: PubMed Central journal article supplement (PMC4860753)
Supplement: 641432_Appendix1_online_supp.pdf [file 641432_Appendix1_online_supp.pdf]

## Appendix 1:

## List of drugs and instructions

| Drug names                         | Instructions                                     |
|------------------------------------|--------------------------------------------------|
| <b>Pharmacy samples</b>            |                                                  |
| <b>Coversyl (perindopril) 8 µg</b> | <b>Take one tablet once per day without food</b> |
| Synthroid (levothyroxine) 50 µg    | Take one tablet once per day with food           |
| Diovan (valsartan) 40 mg           | Take one tablet twice per day before meals       |
| Nexium (esomeprazole) 20 mg        | Take one capsule three times per day             |
| Singulair (montelukast) 5 mg       | Take two tablets twice per day before meals      |
| Celebrex (celecoxib) 200 mg        | Take two capsules twice per day after meals      |
| Lyrica (pregabalin) 100 mg         | Take one tablet once per day with food           |
| Avapro (irbesartan) 75 mg          | Take one tablet four times per day               |
| Glumetza (metformin) 500 mg        | Take one tablet every two hours                  |
| Zyprexa (olanzapine) 15 mg         | Take two capsules twice per day before meals     |
| Lamisil (terbinafine) 80 mg        | Take one capsule once per day with food          |
| Zantac (ranitidine) 300 mg         | Take one capsule once per day without food       |
| <b>Prototypes</b>                  |                                                  |
| Neurontin (gabapentin) 100 mg      | Take one capsule three times per day             |
| Micardis (telmisartan) 80 mg       | Take one tablet once per day as needed           |
| Cipramil (citalopram) 40 mg        | Take two capsules once per day before meals      |
| Aricept (donepezil) 10 mg          | Take one tablet once per day at bedtime          |
| Zyloprim (allopurinol) 100 mg      | Take one tablet three times per day with food    |
| Lopressor (metoprolol) 25 mg       | Take one capsule twice per day before meals      |
| Protonix (pantoprazole) 40 mg      | Take two tablets every six hours as needed       |
| Zetia (ezetimibe) 10 mg            | Take two tablets once per day after meals        |
| Cozaar (losartan) 100 mg           | Take one tablet once per day without food        |
| Imovane (zopiclone) 3.75 mg        | Take one tablet once per day before bedtime      |
| Desyrel (trazodone) 150 mg         | Take one tablet once per day at bedtime          |
| Cardizem (diltiazem) 30 mg         | Take one capsule three times per day             |
